# Supplementary material for: Deletion of JMJD2B in neurons leads to defective spine maturation, hyperactive behavior and memory deficits in mouse
Source: PubMed Central journal article supplement (PMC4872455; doi:10.1038/tp.2016.31), 2016-03-29

Supplementary table1

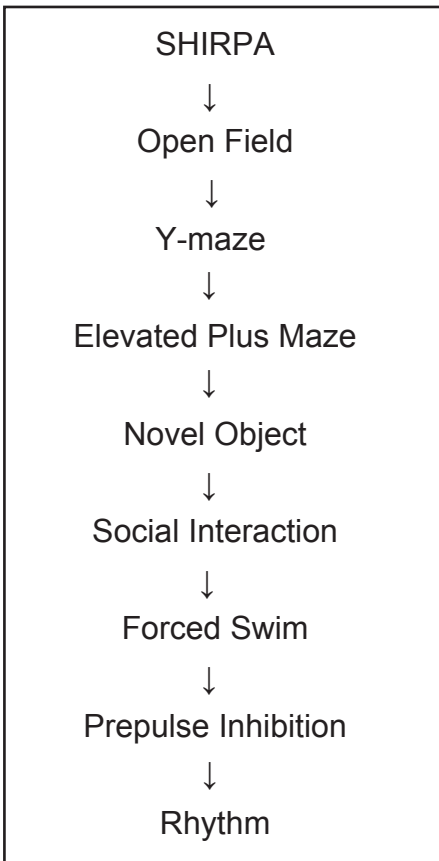

Supplement: tp201631x2.pdf [file tp201631x2.pdf]
