# Supplementary material for: Deletion of JMJD2B in neurons leads to defective spine maturation, hyperactive behavior and memory deficits in mouse
Source: PubMed Central journal article supplement (PMC4872455; doi:10.1038/tp.2016.31), 2016-03-29
Supplement: tp201631x3.pdf [file tp201631x3.pdf]

Supplementary Table 2

| No. | Assessment              | f/f  | f/f taucrc | significant difference |
|-----|-------------------------|------|------------|------------------------|
| 1   | coat color              | 0.0  | 0.0        | n.s.                   |
| 2   | hair length             | 0.2  | 0.2        | n.s.                   |
| 3   | hair morphology         | 0.0  | 0.0        | n.s.                   |
| 4   | respiration rate        | 2.0  | 2.0        | n.s.                   |
| 5   | tremor                  | 0.0  | 0.0        | n.s.                   |
| 6   | body position           | 2.8  | 2.9        | n.s.                   |
| 7   | spontaneous activity    | 2.4  | 2.6        | n.s.                   |
| 8   | defecation              | 3.2  | 2.3        | n.s.                   |
| 9   | urination               | 0.3  | 0.2        | n.s.                   |
| 10  | latency to move         | 6.4  | 11.0       | n.s.                   |
| 11  | locomotor activity      | 10.7 | 13.4       | n.s.                   |
| 12  | transfer arousal        | 3.4  | 3.4        | n.s.                   |
| 13  | piloerection            | 0.0  | 0.0        | n.s.                   |
| 14  | palpebral closure       | 0.1  | 0.0        | n.s.                   |
| 15  | startle response        | 0.9  | 1.0        | n.s.                   |
| 16  | gait                    | 0.0  | 0.0        | n.s.                   |
| 17  | pelvic elevation        | 1.9  | 2.0        | n.s.                   |
| 18  | tail elevation          | 1.0  | 1.0        | n.s.                   |
| 19  | touch escape            | 1.7  | 2.0        | n.s.                   |
| 20  | positional passivity    | 0.1  | 0.0        | n.s.                   |
| 21  | trunk curl              | 0.0  | 0.0        | n.s.                   |
| 22  | limb grasping           | 0.0  | 0.0        | n.s.                   |
| 23  | visual placing          | 2.1  | 2.0        | n.s.                   |
| 24  | grip strength           | 2.5  | 2.6        | n.s.                   |
| 25  | body tone               | 0.3  | 0.5        | n.s.                   |
| 26  | head morphology         | 0.0  | 0.0        | n.s.                   |
| 27  | pinna reflex            | 0.9  | 1.0        | n.s.                   |
| 28  | pinna morphology r      | 0.0  | 0.0        | n.s.                   |
| 29  | pinna morphology l      | 0.1  | 0.1        | n.s.                   |
| 30  | corneal reflex          | 1.0  | 1.0        | n.s.                   |
| 31  | toe pinch               | 0.4  | 0.4        | n.s.                   |
| 32  | body length             | 8.5  | 8.3        | n.s.                   |
| 33  | tail length             | 6.9  | 6.9        | n.s.                   |
| 34  | tail morphology         | 0.1  | 0.1        | n.s.                   |
| 35  | lacrimation             | 0.0  | 0.0        | n.s.                   |
| 36  | whisker morphology      | 0.1  | 0.1        | n.s.                   |
| 37  | teeth morphology        | 0.0  | 0.0        | n.s.                   |
| 38  | provoked biting         | 0.1  | 0.5        | n.s.                   |
| 39  | salivation              | 0.0  | 0.0        | n.s.                   |
| 40  | heart rate              | 1.1  | 1.5        | n.s.                   |
| 41  | abnormal tone           | 0.5  | 0.5        | n.s.                   |
| 42  | skin color              | 1.4  | 1.5        | n.s.                   |
| 43  | limb morphology fr      | 0.0  | 0.0        | n.s.                   |
| 44  | limb morphology fl      | 0.0  | 0.0        | n.s.                   |
| 45  | limb morphology fr      | 0.0  | 0.0        | n.s.                   |
| 46  | limb morphology fl      | 0.0  | 0.0        | n.s.                   |
| 47  | limb tone               | 0.2  | 0.1        | n.s.                   |
| 48  | wire manover            | 0.2  | 0.0        | n.s.                   |
| 49  | righting reflex         | 0.0  | 0.0        | n.s.                   |
| 50  | contact righting reflex | 0.8  | 0.9        | n.s.                   |
| 51  | negative geotaxis       | 0.1  | 0.1        | n.s.                   |
| 52  | fear                    | 0.0  | 0.0        | n.s.                   |
| 53  | irritability            | 0.8  | 0.8        | n.s.                   |
| 54  | aggregation             | 0.4  | 0.3        | n.s.                   |
| 55  | vocalization            | 0.7  | 1.0        | p=0.0405               |
| 56  | body weight             | 25.4 | 25.0       | n.s.                   |
